# Supplementary material for: The isotype and IgG subclass distribution of anti-carbamylated protein antibodies in rheumatoid arthritis patients
Source: PubMed Central journal article supplement (PMC5558706; doi:10.1186/s13075-017-1392-z), 2017-08-15
Supplement: 13075_2017_1392_MOESM1_ESM.pdf [file 13075_2017_1392_MOESM1_ESM.pdf]

## Upper limit of the anti-CarP antibody ELISAs

| Anti-CarP Isotype/<br>IgG-subclass | Upper limit (AU/ml) |
|------------------------------------|---------------------|
| IgM                                | 32,000              |
| IgG                                | 2,000               |
| IgA                                | 3,160               |
| IgG1                               | 10,200              |
| IgG2                               | 2,000               |
| IgG3                               | 8,000               |
| IgG4                               | 2,000               |
