# Supplementary material for: The isotype and IgG subclass distribution of anti-carbamylated protein antibodies in rheumatoid arthritis patients
Source: PubMed Central journal article supplement (PMC5558706; doi:10.1186/s13075-017-1392-z), 2017-08-15
Supplement: 13075_2017_1392_MOESM5_ESM.pdf [file 13075_2017_1392_MOESM5_ESM.pdf]

### Associations of anti-CarP antibody isotypes and IgG subclasses with risk factors.

| Isotypes                       | IgG-<br>(n=190) | IgG +<br>(n=184) | OR (95% CI)      | p                 | IgA-<br>(n=221) | IgA+<br>(n=152) | OR (95% CI)      | p     | IgM-<br>(n=312) | IgM+<br>(n=61) | OR (95% CI)      | p            |
|--------------------------------|-----------------|------------------|------------------|-------------------|-----------------|-----------------|------------------|-------|-----------------|----------------|------------------|--------------|
| <b>Smoking (ever)</b><br>n (%) | 73 (41.5)       | 89 (51.7)        | 1.51 (0.99-2.31) | 0.055             | 88 (42.9)       | 72 (50.7)       | 1.37 (0.89-2.10) | 0.153 | 132 (45.5)      | 28 (49.1)      | 1.16 (0.66-2.04) | 0.618        |
| <b>SE positivity,</b><br>n (%) | 108 (58.1)      | 137 (77.0)       | 2.41 (1.53-3.80) | <b>&lt;0.001*</b> | 138 (64.5)      | 106 (71.1)      | 1.36 (0.86-2.13) | 0.185 | 197 (64.8)      | 47 (79.7)      | 2.13 (1.08-4.18) | <b>0.029</b> |

  

| IgG subclasses                 | IgG1-<br>(n=33) | IgG1+<br>(n=149) | OR (95% CI)      | p     | IgG2-<br>(n=100) | IgG2+<br>(n=82) | OR (95% CI)      | p     | IgG3-<br>(n=157) | IgG3+<br>(n=25) | OR (95% CI)      | p     | IgG4-<br>(n=98) | IgG4+<br>(n=84) | OR (95% CI)      | p     |
|--------------------------------|-----------------|------------------|------------------|-------|------------------|-----------------|------------------|-------|------------------|-----------------|------------------|-------|-----------------|-----------------|------------------|-------|
| <b>Smoking (ever)</b><br>n (%) | 14 (43.8)       | 73 (52.9)        | 1.44 (0.67-3.13) | 0.352 | 48 (49.5)        | 39 (53.4)       | 1.17 (0.64-2.15) | 0.611 | 80 (54.1)        | 7 (31.8)        | 0.40 (0.15-1.03) | 0.057 | 43 (46.7)       | 44 (56.4)       | 1.48 (0.80-2.71) | 0.209 |
| <b>SE positivity,</b><br>n (%) | 23 (71.9)       | 112 (77.8)       | 1.37 (0.58-3.25) | 0.476 | 73 (74.5)        | 62 (79.5)       | 1.33 (0.65-2.71) | 0.437 | 117 (76.5)       | 18 (78.3)       | 1.11 (0.38-3.19) | 0.850 | 74 (77.1)       | 61 (76.3)       | 0.95 (0.47-1.92) | 0.896 |

Logistic regression univariate for risk factor analysis (smoking and SE positivity)

IgG subclass analysis in anti-CarP IgG positive patients

Bold means significant difference, \*remained significant after Holm-Bonferroni correction

Holm-bonferroni correction separately for independent analyses in whole cohort

SE, shared epitope; OR, odds ratio; CI, confidence interval
